# Supplementary material for: Comparative genomics of Pseudomonas syringae pathovar tomato reveals novel chemotaxis pathways associated with motility and plant pathogenicity
Source: PeerJ. 2016 Oct 25;4:e2570. doi: 10.7717/peerj.2570 (PMC5088630; doi:10.7717/peerj.2570)
Supplement: Supplemental Information 1 [file peerj-04-2570-s004.docx]

**Supplementary Information for:**

Comparative genomics of *Pseudomonas syringae* pathovar *tomato* reveals novel chemotaxis pathways associated with motility and plant pathogenicity

Christopher R. Clarke1, Byron W. Hayes1, Brendan J. Runde1, Eric Markel2, Bryan M. Swingle2,3, and Boris A. Vinatzer1

1Department of Plant Pathology, Physiology, and Weed Science. Virginia Tech. Blacksburg, VA, USA.

2 Emerging Pests and Pathogens Research Unit, Robert W. Holley Center for Agriculture and Health, ,United States Department of Agriculture-Agricultural Research Service, Ithaca, NY, USA.

3Plant Pathology and Plant-Microbe Biology Section, School of Integrative Plant Science, Cornell University, Ithaca, NY, U.S.A.

**Correspondence:** [thechrisclarke@gmail.com](mailto:thechrisclarke@gmail.com)

**Contents:**

Tables S1-S2

Figures S1-S7

Author Contributions

**Other Files included in this submission**

Supplementary videos 1-3

| **Annotation** | **Start** | **End** | **Frame** | **Length(nt)** | **Accession** |
| --- | --- | --- | --- | --- | --- |
| **che1 - based on 60k-90k ctg 127 PtoT1 genome (some accession #s are from other strains)** | | | | | |
| hypothetical | 77 | 796 | -3 | 720 | NP_790769 |
| glutothione s-trans | 1010 | 1795 | -3 | 786 | ZP_03398314 |
| hypothetical | 1789 | 2145 | +1 | 357 | ZP_03398315 |
| pilin | 2426 | 3355 | -3 | 930 | ZP_03398316 |
| PilB | 3086 | 4780 | +2 | 1695 | ZP_03398317 |
| PilC | 4783 | 6000 | +1 | 1218 | ZP_03398318 |
| PilD | 6002 | 6874 | +2 | 873 | ZP_03398319 |
| dephospho-CoA kinase | 6871 | 7494 | +1 | 624 | ZP_03398320 |
| hypothetical (DNA gyr inhib) | 7491 | 7700 | +3 | 210 | NP_790761 |
| hypothetical protein | 7967 | 8293 | -3 | 327 | ZP_03398322 |
| hypothetical | 8490 | 9119 | +3 | 630 | ZP_03398323 |
| MOSC domain prot | 9116 | 9649 | +2 | 534 | ZP_03398324 |
| NADH dehydrogenase | 9866 | 11164 | +2 | 1299 | ZP_03398325 |
| mcp | 11592 | 12806 | +3 | 1215 | ZP_03398326 |
| cheY-122 | 12816 | 13184 | +3 | 369 | ZP_03398327 |
| STAS domain prot | 13211 | 13501 | +2 | 291 | ZP_03398328 |
| cheA-678 | 13614 | 15650 | +3 | 2037 | ZP_03398329 |
| - | 15684 | 15908 | +3 | 225 | - |
| mcp | 15679 | 17334 | +1 | 1656 | ZP_03398330 |
| cheW | 17371 | 17910 | +1 | 540 | ZP_03398331 |
| cheR | 17920 | 18729 | +1 | 810 | ZP_03398332 |
| cheD | 18726 | 19232 | +3 | 507 | ZP_03398333 |
| cheB | 19222 | 20298 | +1 | 1077 | ZP_03398334 |
| hypothetical | 20332 | 21543 | -1 | 1212 | ZP_03398335 |
| hopAI1 | 21712 | 22515 | -1 | 804 | ZP_03398336 |
| hopAH1 | 22682 | 23950 | -3 | 1269 | ZP_03398337 |
| hopAG1 | 24054 | 26159 | -2 | 2106 | ZP_03398338 |
| hypothetical | 26159 | 26410 | -3 | 252 | ZP_03398339 |
| sensor hist kinase | 27216 | 28829 | -2 | 1614 | ZP_03398341 |
| **che2 - Based on ctg57 155K-220K PtoT1 genome (some accession #s are from other strains)** | | | | | |
| transcriptional activ anr | 12957 | 13691 | +3 | 735 | ZP_03395676 |
| adenine phosribotransf | 13753 | 14301 |  | 548 | ZP_03395677 |
| hypothetical | 14432 | 14776 | -2 | 345 | ZP_03395678 |
| cheW | 14834 | 15313 | -2 | 480 | ZP_03395679 |
| cheW | 15371 | 16258 | -2 | 888 | ZP_03395680 |
| parA | 16334 | 17122 | -2 | 789 | ZP_03395681 |
| chemotB | 17168 | 18055 | -2 | 888 | ZP_03395682 |
| chemotA | 18062 | 18802 | -2 | 741 | NP_791807 |
| cheB | 18802 | 19974 | -3 | 1173 | ZP_03395684 |
| cheA | 20025 | 22265 | -1 | 2241 | ZP_03395685 |
| cheZ | 22299 | 23084 | -1 | 786 | ZP_03395686 |
| cheY | 23104 | 23478 | -3 | 375 | ZP_07231294 |
| flg biosynth sigma | 23732 | 24472 | -2 | 741 | ZP_03395688 |
| fleN | 24469 | 25302 | -3 | 834 | NP_791801 |
| flhF | 25418 | 26746 | -2 | 1329 | NP_791800 |
| flhA | 26758 | 28797 | -3 | 2040 | NP_791799 |
| flhB | 29272 | 30408 | -3 | 1137 | NP_791798 |
| fliR | 30410 | 31186 | -2 | 777 | NP_791797 |
| fliQ | 31202 | 31471 | -2 | 270 | NP_791796 |
| fliP | 31497 | 32249 | -1 | 753 | NP_791795 |
| flliO | 32249 | 32689 | -2 | 441 | NP_791794 |
| fliN | 32690 | 33148 | -2 | 459 | NP_791793 |
| fliM | 33210 | 34178 | -1 | 969 | NP_791792 |
| fliL | 34188 | 34691 | -1 | 504 | NP_791791 |
| fliK | 35246 | 36670 | -2 | 1425 | ZP_03395701 |
| HPT dom. Cont. | 36769 | 37077 | -3 | 309 | NP_791788 |
| response regulator | 37159 | 38724 | -3 | 1566 | ZP_03395703 |
| STAS | 38870 | 39469 | -2 | 321 | NP_791786 |
| fliJ | 39255 | 39704 | -1 | 450 | NP_791785 |
| fliI | 39711 | 41123 | -1 | 1413 | NP_791784 |
| fliH | 41059 | 41877 | -3 | 819 | ZP_03395707 |
| fliG | 41893 | 42909 | -3 | 1017 | ZP_05638959 |
| fliF | 42902 | 44686 | -2 | 1785 | NP_791781 |
| fliE | 44702 | 45031 | -2 | 330 | ZP_03395710 |
| sigma54-dep tran reg fleR | 45273 | 46688 | -1 | 1416 | ZP_03395711 |
| hypothetical | 46688 | 47902 | -2 | 1215 | ZP_03395712 |
| trans reg fleQ | 48025 | 49500 | -3 | 1476 | ZP_03395713 |
| fliS | 49999 | 50388 | -3 | 390 | NP_791775 |
| fliD | 50514 | 51986 | -1 | 1473 | ZP_03395716 |
| flaG | 52070 | 52468 | -2 | 399 | ZP_03395717 |
| fliC | 52535 | 53383 | -2 | 849 | ZP_03395718 |
| 3-oxoacyl synthase | 53713 | 54642 | -3 | 930 | ZP_03395719 |
| glycosyl transferase | 54925 | 57831 | -3 | 2907 | ZP_03395720 |
| glycosyl transferase | 57963 | 61079 | -1 | 3117 | ZP_03395721 |
| flgL | 61627 | 63219 | -3 | 1593 | ZP_03395722 |
| flgK | 63233 | 64942 | -2 | 1710 | NP_791767 |

**Table S1.** Genes in the *che1* and *che2* clusters and associated accession numbers.

| **Gene** | **Purpose** | **Forward Primer** | **Reverse Primer** |
| --- | --- | --- | --- |
| *cheA1* | Disruption | AAAAAGGGCCCTGATTgcaaagccctgtggttgc | AAAAAATCGATTCATatgacccttggccggttt |
| *cheA2* | Disruption | AAAAAGGGCCCTGATgctagcgcctctacgaggtt | AAAAAATCGATTCATTacgaattcgaaaacctgctg |
| *cheA1* | Disruption - integration check | accggcactgacctcgtt | cgatttcaatgacgatgctg |
| *cheA2* | Disruption - integration check | gcgtttcgataccgtggtc | ctcgtttgacagtgctgtgg |
| *cheA1* | Cloning | AAAAACTCGAGGAAGCCCGTGAGCTGTTG | AAAAAGAGCTCCAAATCCGTCAGCGAGAAG |
| *cheA2* | Cloning | AAAAACTCGAGTTAGGGAGCACCCCATGA | AAAAAGAGCTCGCAACCCCGGATTCAAATA |
| *cheA1* | Deletion | GGGTGTCGTGCTGTAACGCGTCTATTTGAAGTACCGCCGGGTGATCGACAAAGGAAGTCATCGTGAGCATTAATCTCGATGTGGAGGCTGGAGCTGCTTC | TGGTGGAAATCTTCAGATCGTAGAACCATTTCATCGGGTTACTCCTTGGAATTGCAAATCCGTCAGCGAGAAGCGGGCGACATATGAATATCCTCCTTAG |
| *cheA1* | Sequencing | CCCTGGAGGTCAGCATGTCTACAA |  |
| *cheA1* | Sequencing | CTCAGCAGCTTCCTGCTCCATCT |  |
| *cheA1* | Integration check and sequencing | CCGAAGCAGCTCGCATGGA | TGTCGATCAGGATGATCTGG |
| *cheA1* | Sequencing | GGTCATCCAGCGCGAGGC |  |
| *cheA1* | Sequencing | CTGAGCGGCCTGATTCACCT |  |
| *cheA1* | Sequencing | GTTTGCTGCCGCAGATCGC |  |
| *cheA1* | Sequencing | CTGACGATCTACACCGTGACCGAA |  |
| *cheA1* | Sequencing | CCCTGGAGGTCAGCATGTCTACAA |  |
| *cheA1* | Sequencing | CTCAGCAGCTTCCTGCTCCATCT |  |
| *cheA1* | Sequencing | GCTGAACATCTGACGATCCTGGT |  |
| scar | Deletion scar check | GTGTAGGCTGGAGCTGCTTC |  |
| scar | Deletion scar check | CATATGAATATCCTCCTTA |  |
| *cheA2* | *cheA-2* deletion 5' Flank | CGAGGAAAGCACGCCGATCA | GAAGCAGCTCCAGCCTCCACGGCGCCGAAGCTCATGGG |
| *cheA2* | *cheA-2* deletion 3' Flank | CTAAGGAGGATATTCATATGGCCGCTCGGCGTATTTGA | GCAGGCGCACGACTGGACA |
| *cheA2* | Integration check and sequencing | ATCAGAGCAGCCGATTGTCTG | CTGGTGACCGAAGTAGAGGGCA |
| *cheA2* | Sequencing | GGCCGAAGAGGTGTCGCA |  |
| *cheA2* | Sequencing | GGCAGTGCCGGTGGTGGT |  |
| *cheA2* | Sequencing | CGTCTTTCCTACGTCGTCAGGCT |  |
| *cheA2* | Sequencing | CAGGCGTGTGGTGAGCATGA |  |
| *cheA2* | Sequencing | GACAAGGGTGAAGGTCCGCA |  |
| *cheA2* | Sequencing | CTTGCCGTTGGTGGCGGT |  |
| *cheA2* | Sequencing | CGTCTTTCCTACGTCGTCAGGCT |  |
| *cheA2* | Sequencing | CAGGCGTGTGGTGAGCATGA |  |
| *cheA2* | Sequencing | CGTCCAGAGCATCCAGCGT |  |

**Table S2.** Primers used in the study.

**
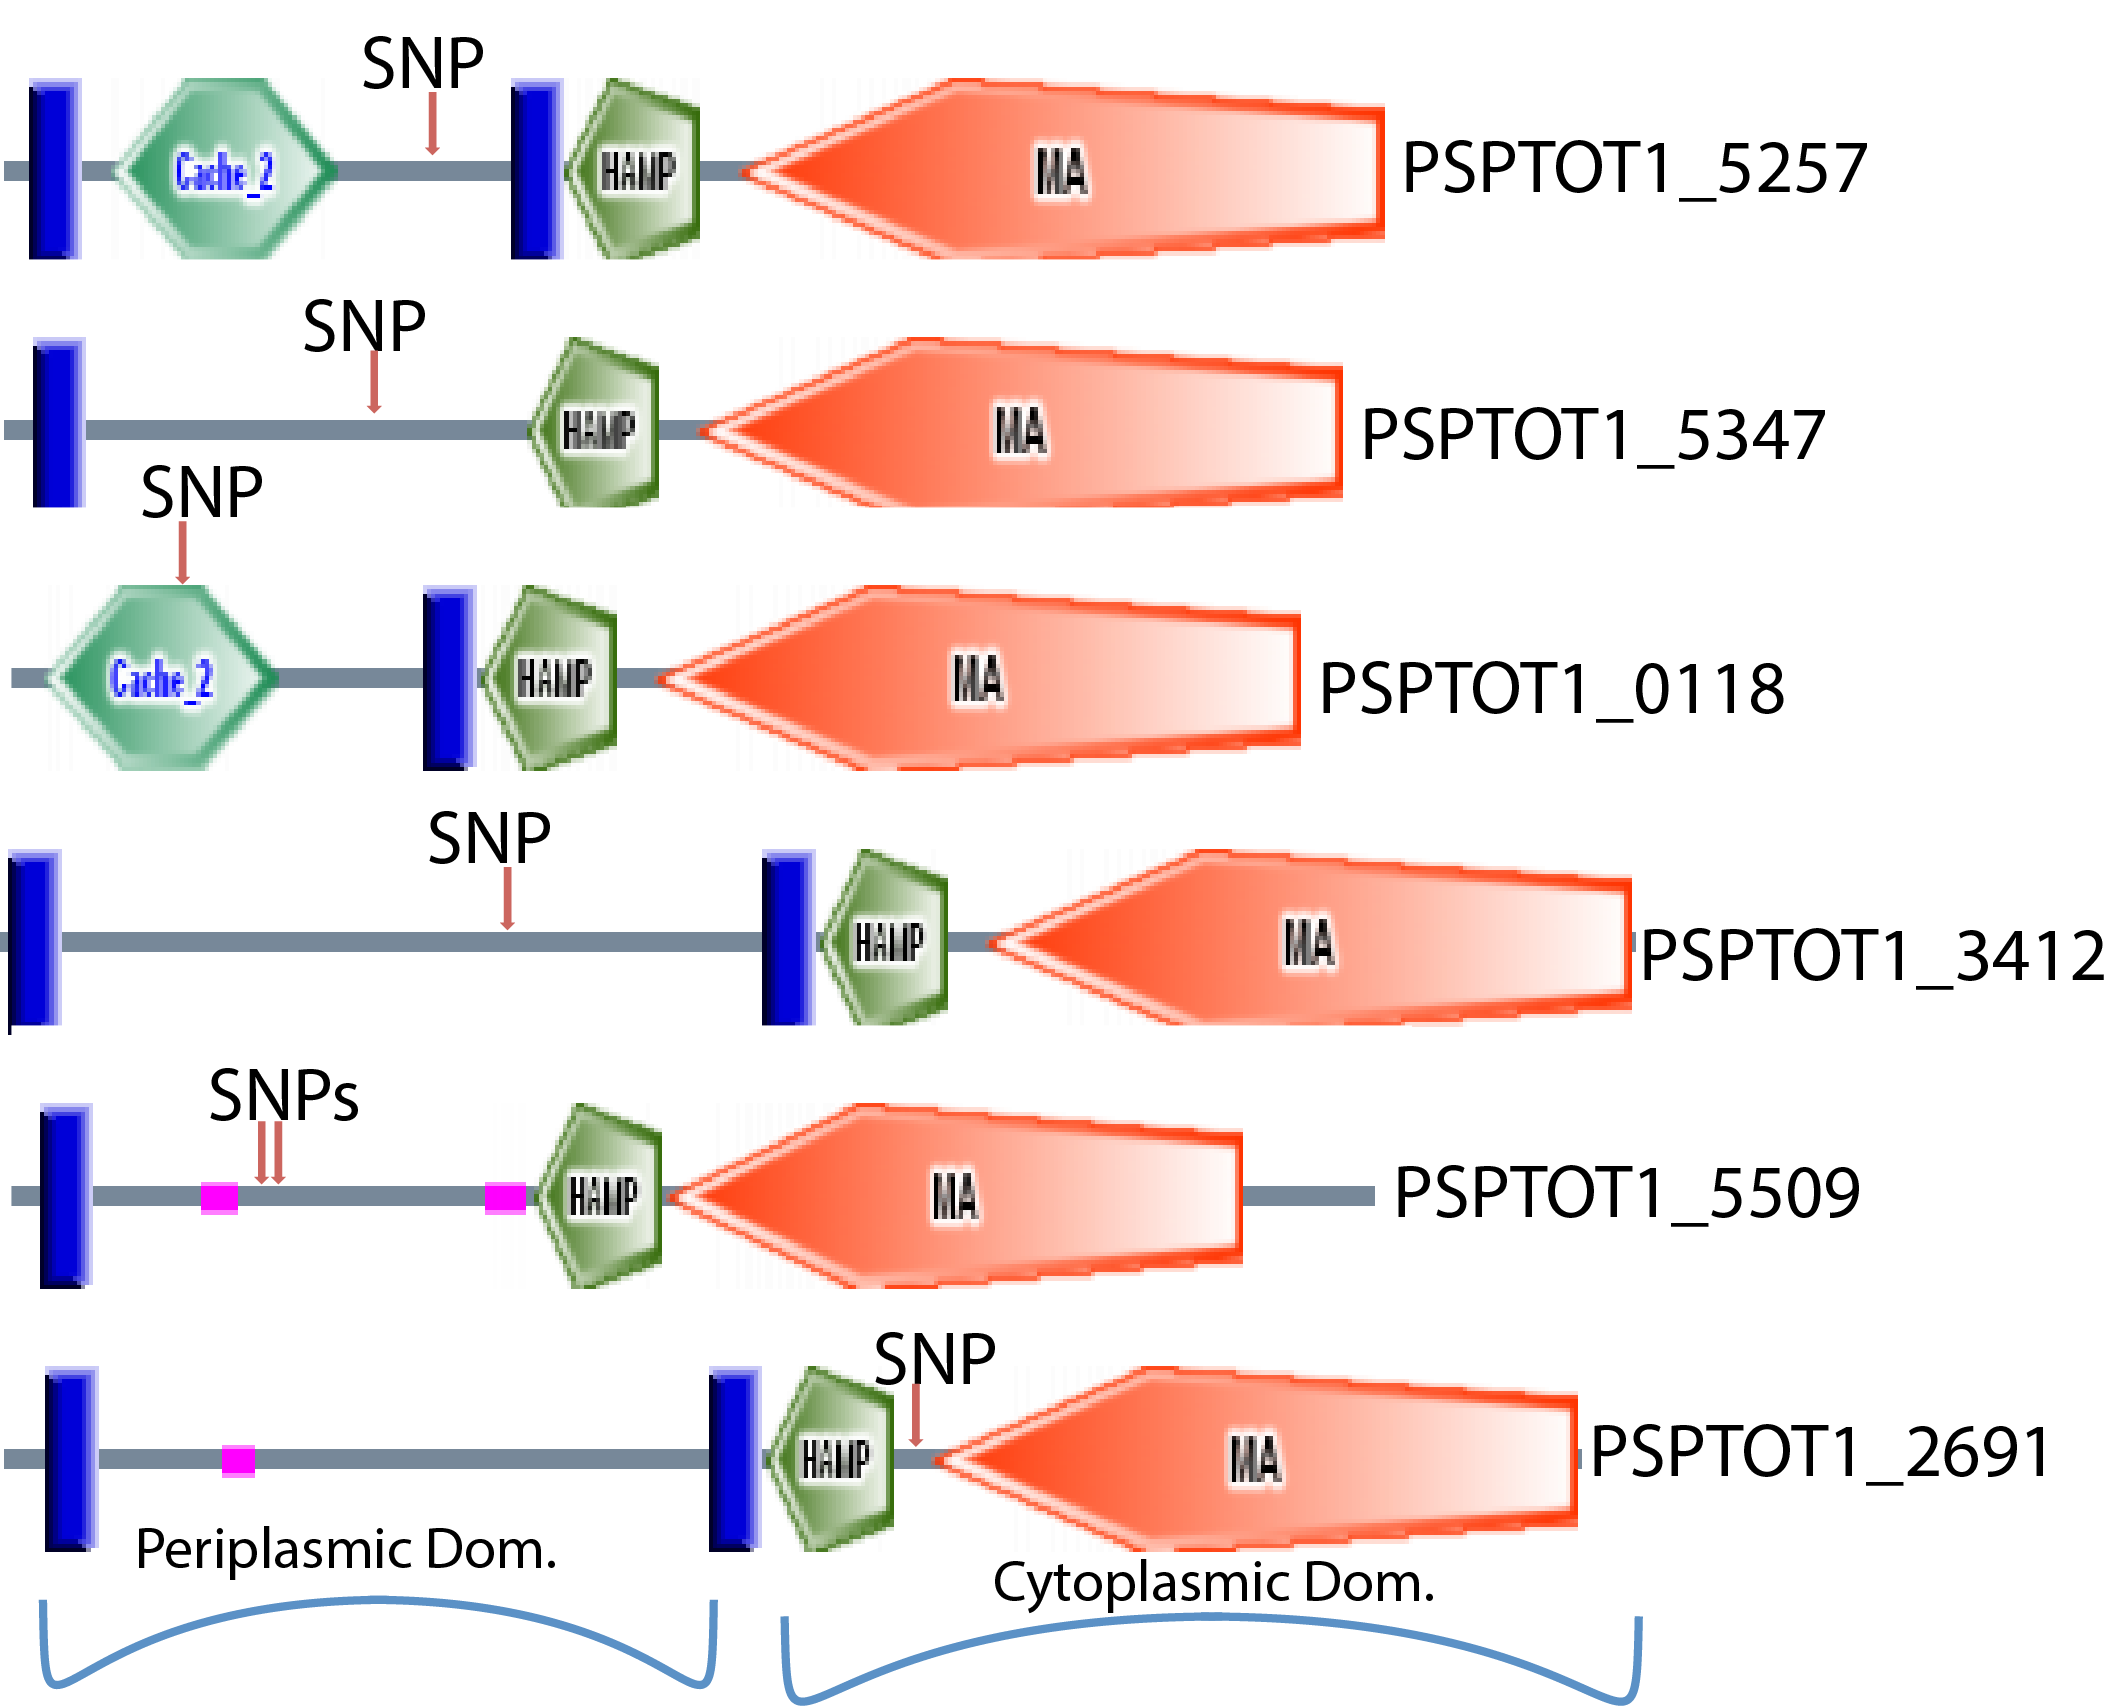
**

**Figure S1.** Location of single nucleotide polymorphisms in methyl-accepting chemotaxis proteins


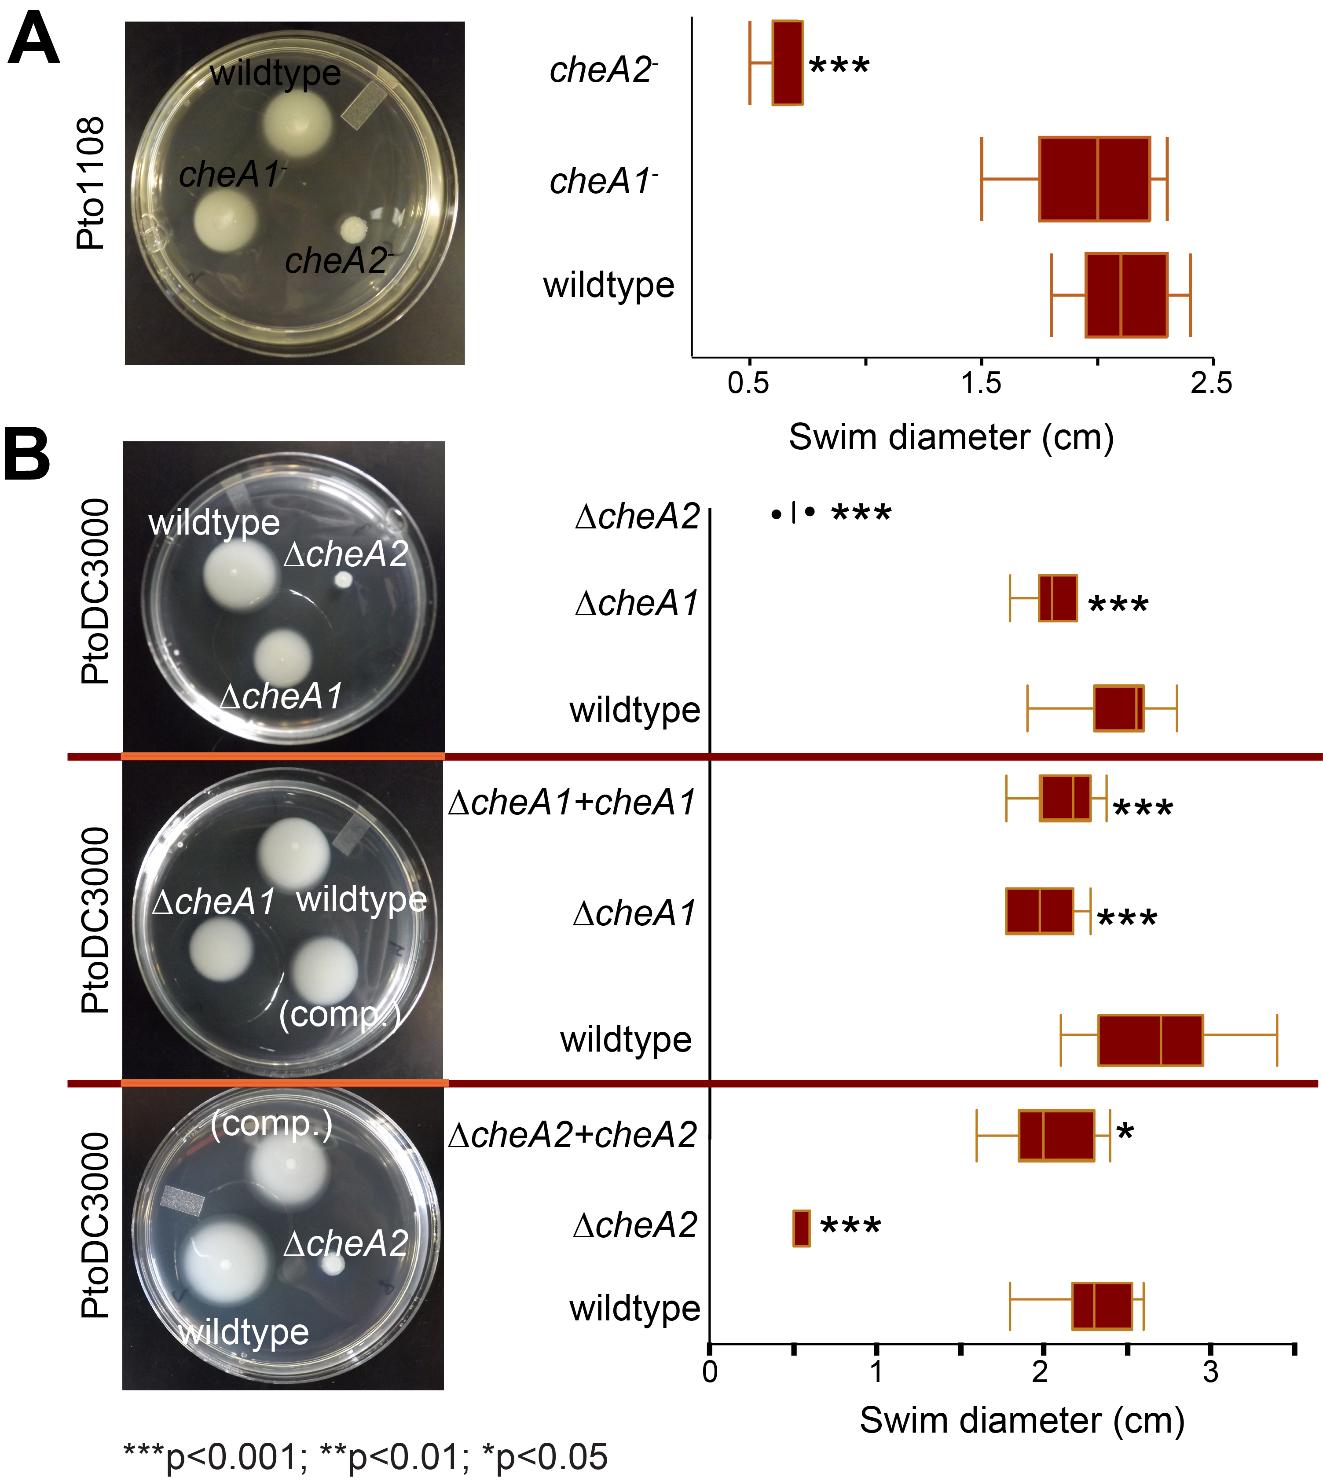


**Figure S2.** Example pictures and box plots of the colony diameter two days after inoculation of Pto1108 chemotaxis disruption strains (**A**) or PtoDC3000 chemotaxis deletion strains (**B)** on 0.28% agar KB swim plates. n = 10 and essentially identical results were obtained in 3 independent experiments. * indicates statistical difference between mutant strain and wildtype and the indicated p-value using a Student’s *t-test*.

**
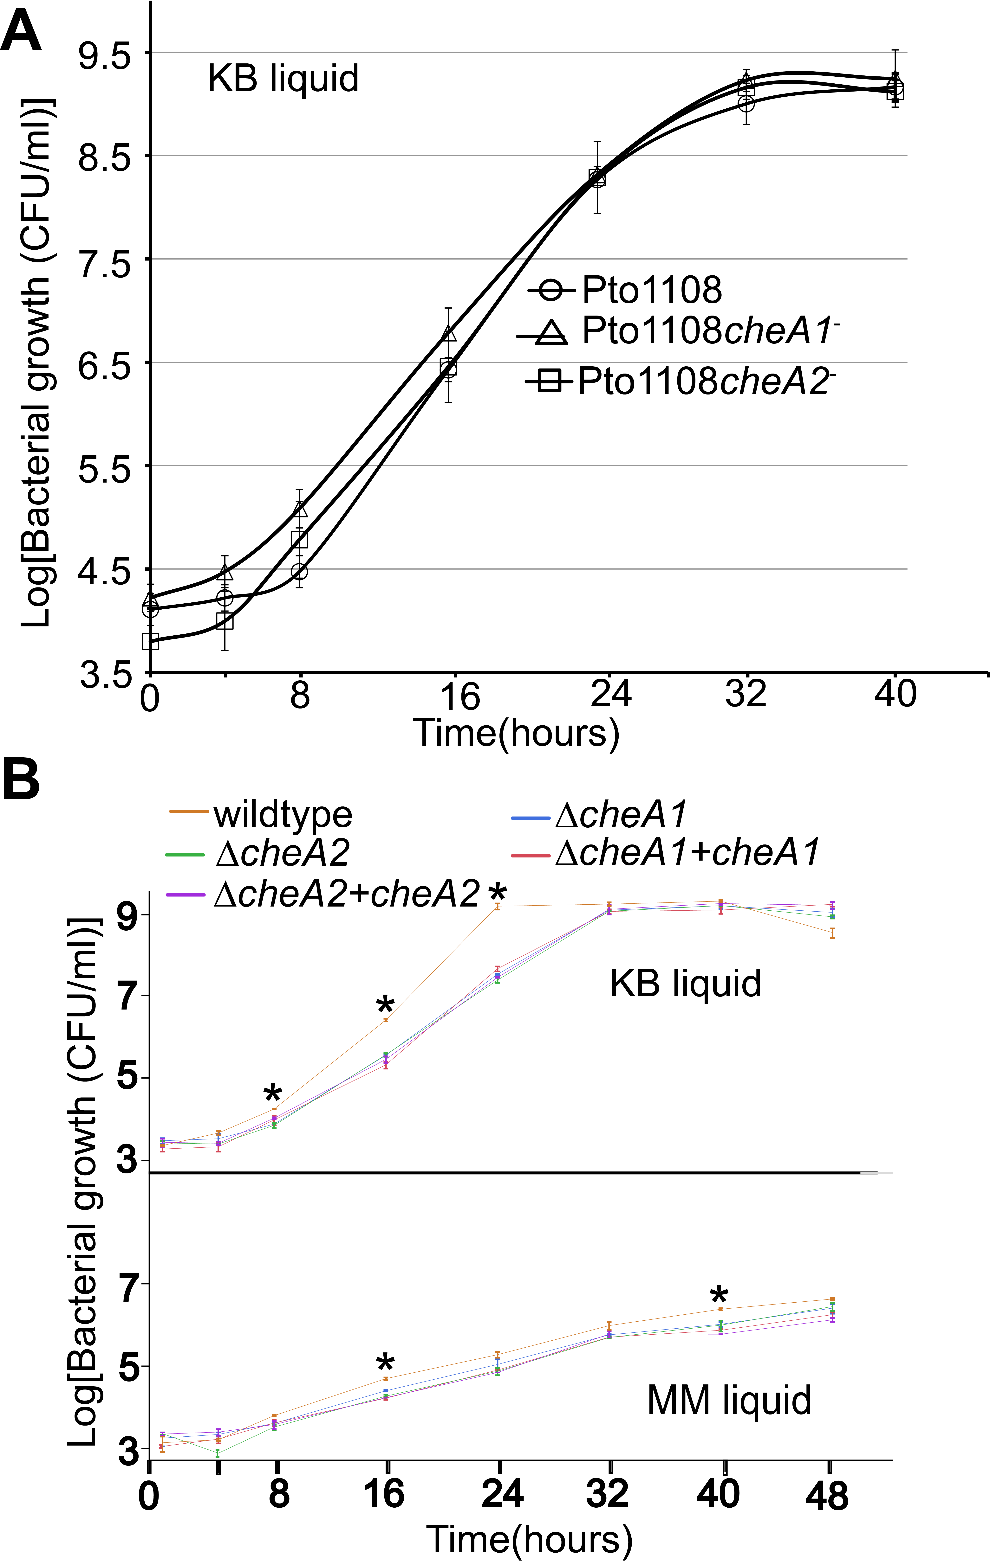
**

**Figure S3.** Growth of Pto1108 chemotaxis disruption mutants (**A**) and PtoDC3000 deletion mutants (**B**) in liquid culture. For A, n= 8. For B, n=3 and essentially identical results were obtained in 2 independent experiments. * indicates that the wildtype strain had a significantly different (p<0.01) population density than all other strains at that time point.

**
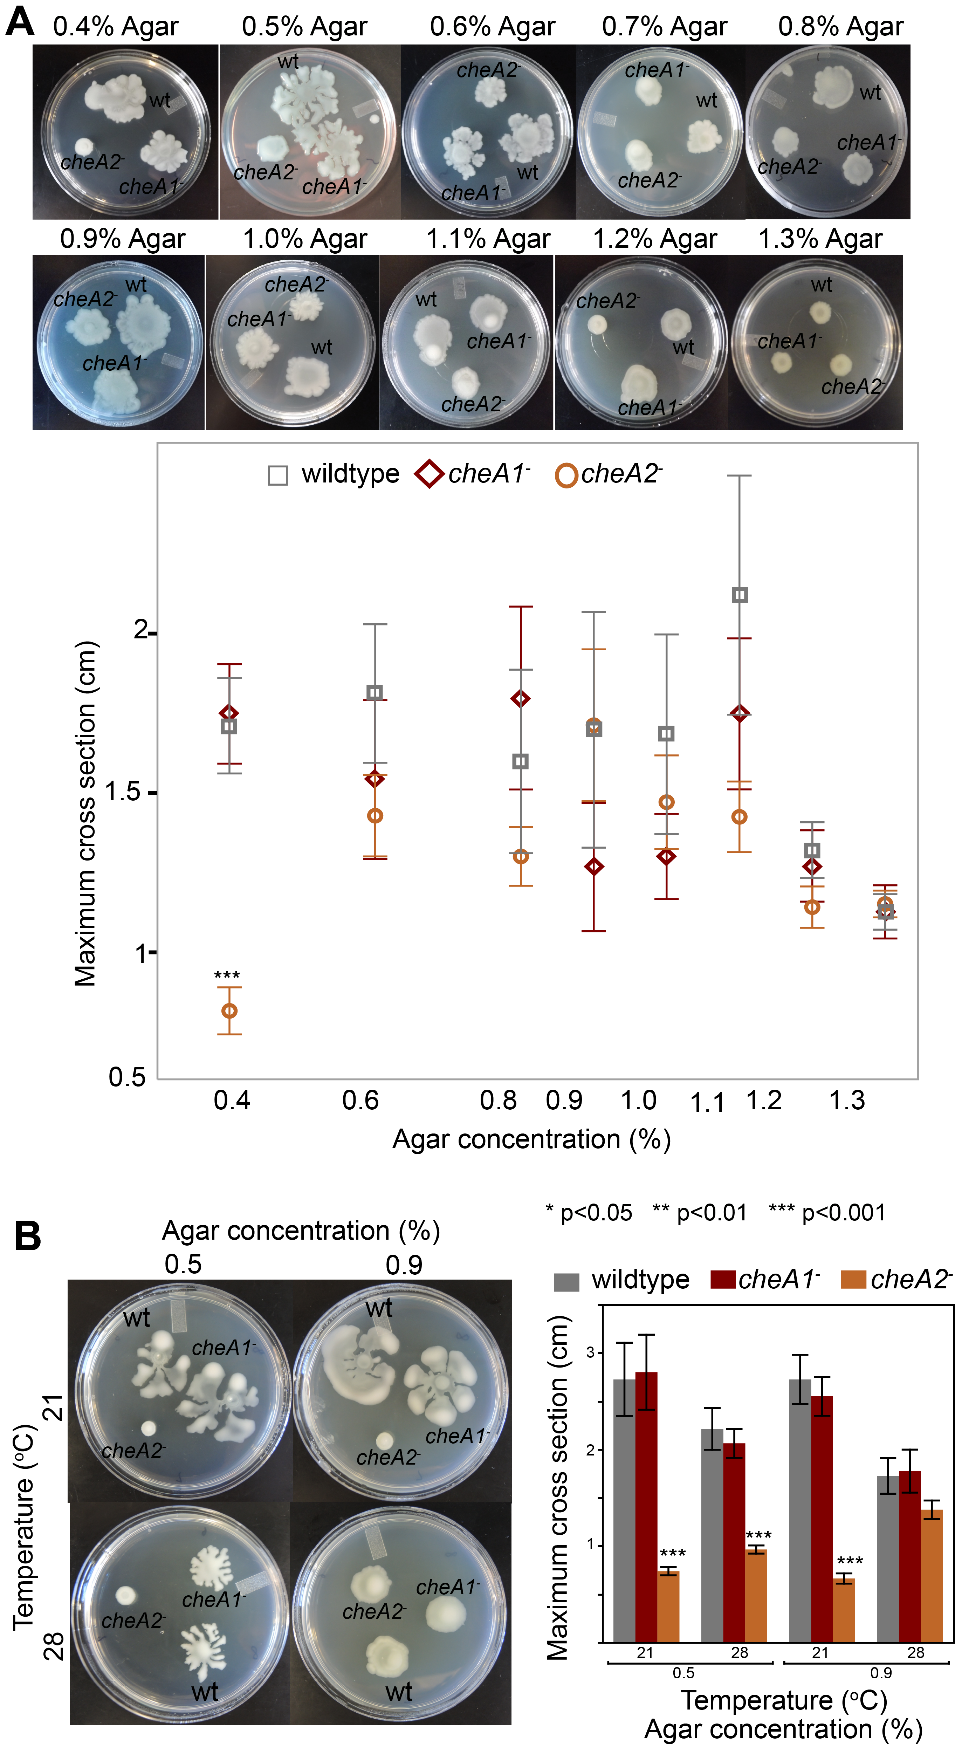
**

**Figure S4.** Example pictures and plotted average maximum swarm diameter of strain Pto1108 chemotaxis disruption mutants at 21oC (**A**) or 28oC or 21oC (**B**). n=8. * indicates significant differences in swim diameter for any strain between the two temperatures at the indicated p-values using a Student’s *t-test*.

**
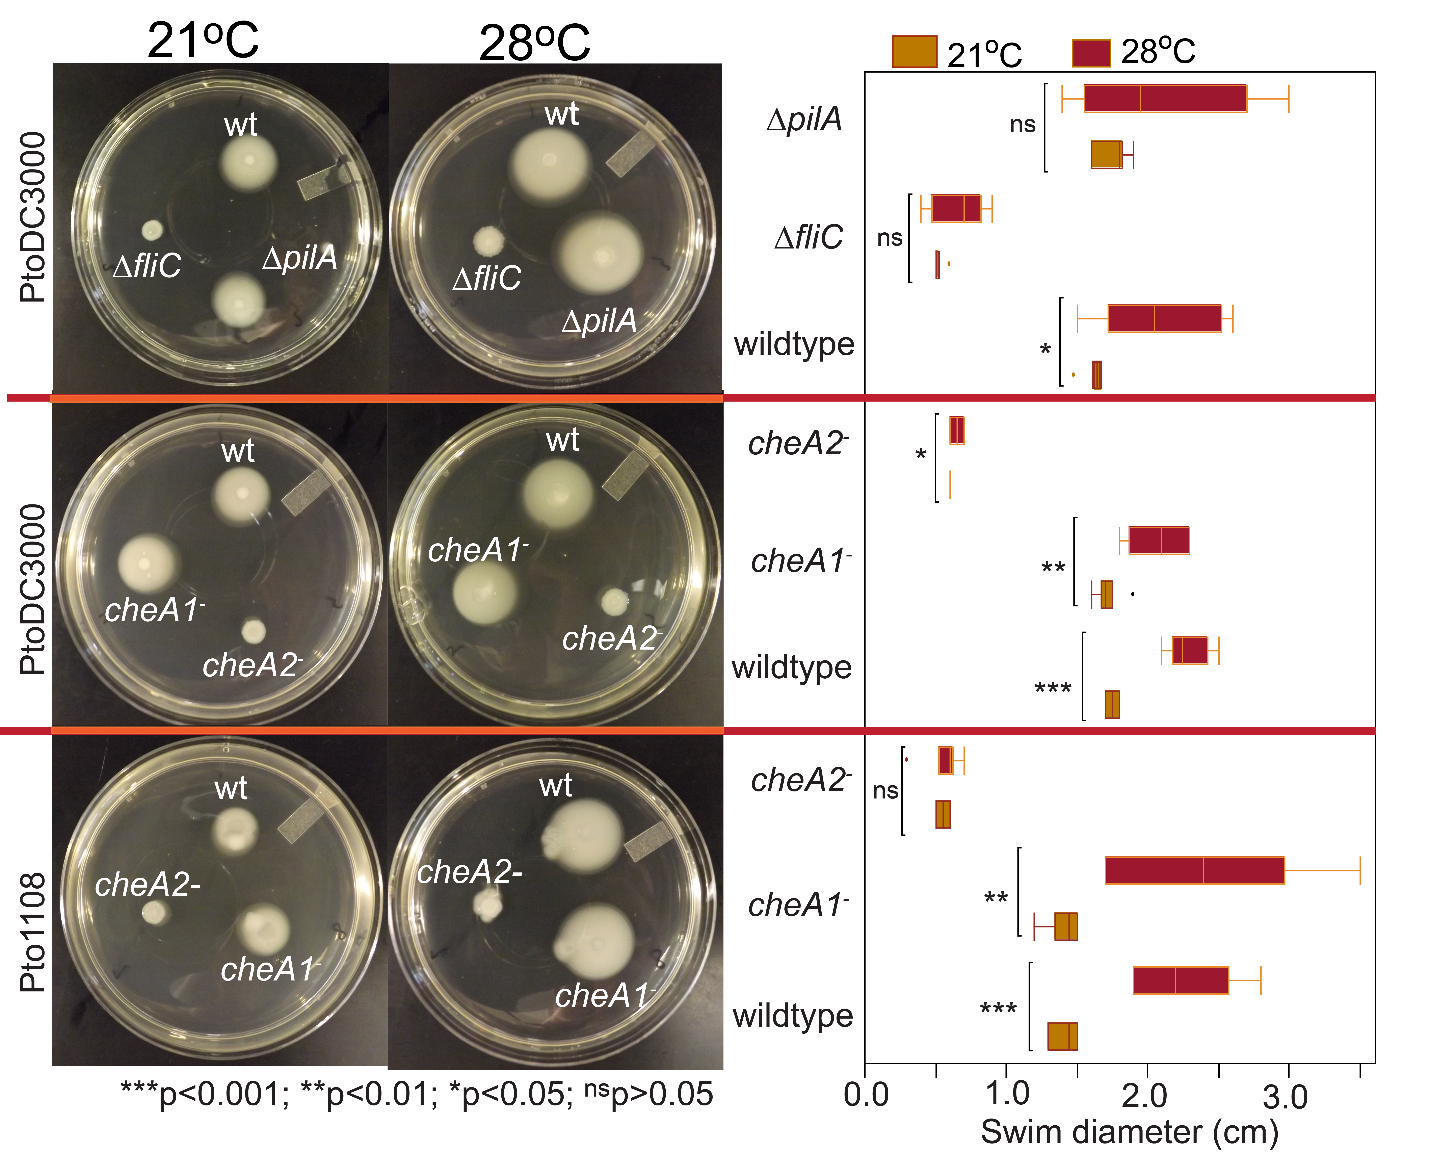
**

**Figure S5.** Example pictures and box plots of the colony diameter two days after inoculation of the indicated strains on 0.28% agar KB swim plates at 28oC or 21oC. * indicates significant differences in swim diameter for any strain between the two temperatures at the indicated p-values using a Student’s *t-test*. The smaller swim diameter is reflective of the slower growth rate of Pto at 21oC. No mutant strain has altered swimming motility relative to wild type due to temperature.

**
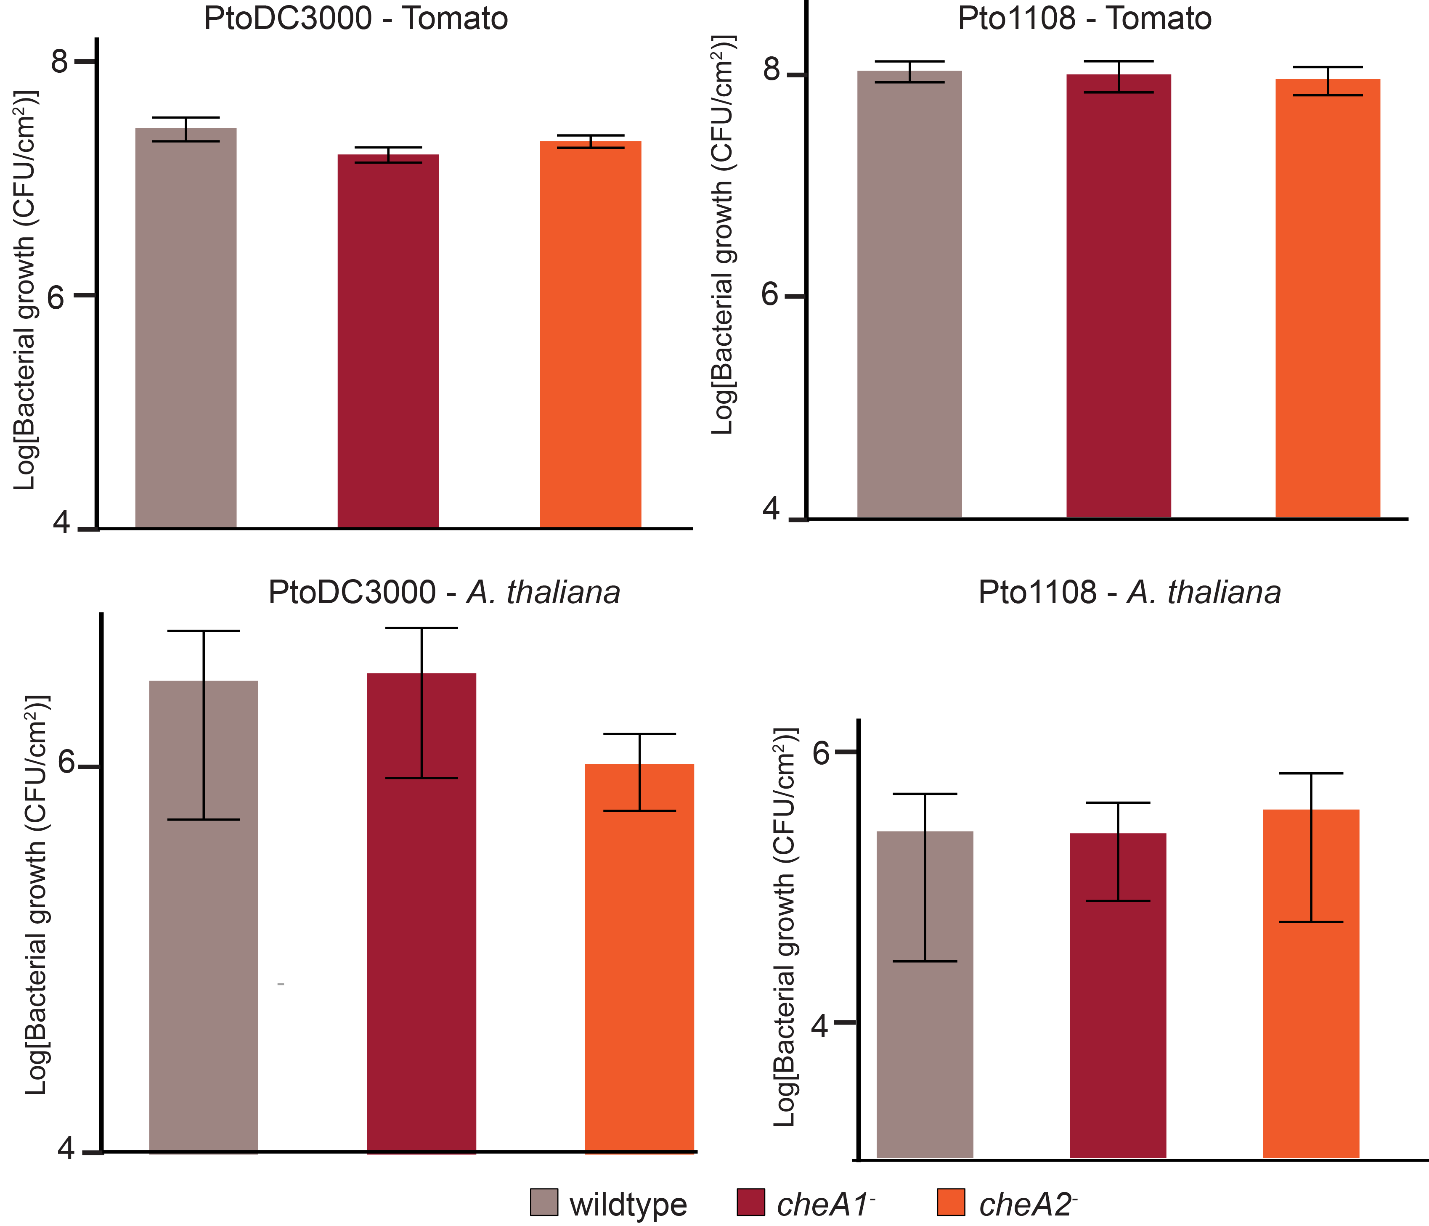
**

Figure S6. Growth of PtoDC3000 or Pto1108 on tomato (*S. lycopersicum* cv. Rio Grande) or *A. thaliana* ecotype Columbia 4 days following syringe infiltration inoculation at 0.001 (*A. thaliana*) or 0.0001 OD600 (tomato). Data represent the average of 4 replicates and error bars are the standard error. Similar results were obtained in at least 4 independent experiments for all sections.

**
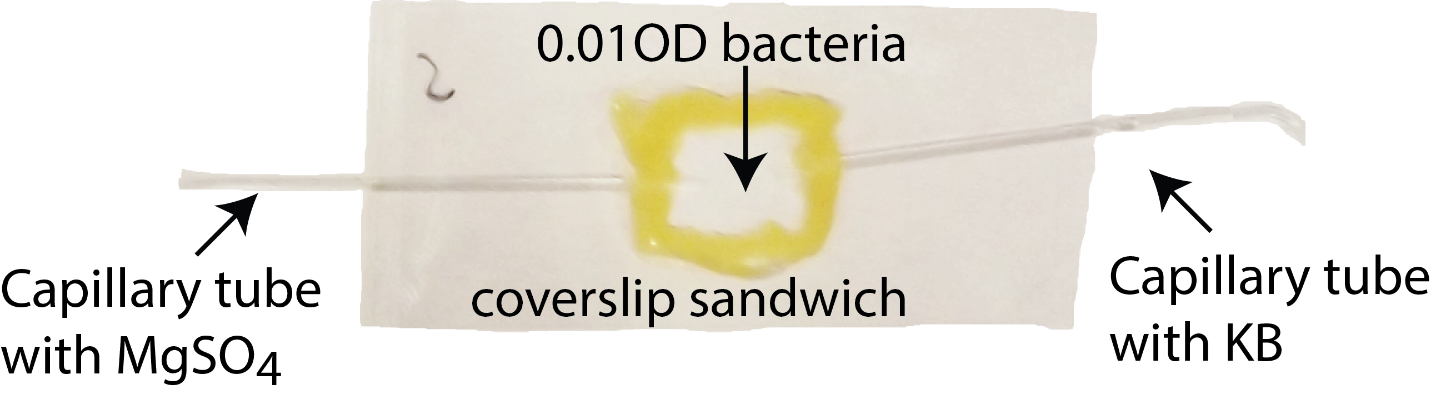
**

**Figure S7.** Setup for chemotaxis split capillary assay.

**Author contributions:** CRC and BAV designed the research; CRC performed the experiments with assistance from BWH and BJR; EM and BMS created the *cheA* deletion strains; CRC wrote the manuscript with subsequent editing from the other co-authors.
